# Supplementary material for: Risk Screening of Invasive Aquatic Species and a Survey of Fish Diversity Using Environmental DNA Metabarcoding Analysis in Shanghai
Source: MDPI journal article supplement (doi:10.3390/d16010029), 2024-01-02
Supplement: s1 [file s1]

**Table S1.** Species composition of fishes at various sites in Shanghai based on the eDNA metabarcoding analysis.

[illegible]

[illegible]

|                    |                   |                       |                                  |   |   |   |   |   |   |   |   |   |   |   |   |   |   |   |   |
|--------------------|-------------------|-----------------------|----------------------------------|---|---|---|---|---|---|---|---|---|---|---|---|---|---|---|---|
|                    | Odontobuti<br>dae | <i>Odontobutis</i>    | <i>Odontobutis potamophila</i>   | ✓ | ✓ | ✓ | ✓ | ✓ | ✓ | ✓ | ✓ | ✓ | ✓ | ✓ | ✓ | ✓ | ✓ | ✓ | ✓ |
|                    |                   | <i>Micropercops</i>   | <i>Micropercops swinhonis</i>    | ✓ | ✓ |   | ✓ | ✓ | ✓ | ✓ | ✓ | ✓ | ✓ | ✓ | ✓ | ✓ | ✓ | ✓ | ✓ |
|                    | Gobiidae          | <i>Rhinogobius</i>    | <i>Rhinogobius giurinus</i>      | ✓ | ✓ |   |   |   | ✓ | ✓ | ✓ | ✓ | ✓ | ✓ | ✓ | ✓ | ✓ |   | ✓ |
|                    |                   |                       | <i>Rhinogobius cliffordpopei</i> | ✓ | ✓ | ✓ |   | ✓ |   | ✓ | ✓ | ✓ | ✓ |   | ✓ | ✓ | ✓ | ✓ |   |
|                    |                   | <i>Mugilogobius</i>   | <i>Mugilogobius myxodermus</i>   | ✓ |   |   |   |   |   |   |   |   |   |   |   |   |   |   |   |
|                    |                   | <i>Tridentiger</i>    | <i>Tridentiger bifasciatus</i>   |   |   |   |   |   | ✓ | ✓ | ✓ | ✓ | ✓ |   |   | ✓ |   |   |   |
|                    | Taenioidid<br>ae  | <i>Odontamblyopus</i> | <i>Odontamblyopus lacepedii</i>  | ✓ |   | ✓ |   |   |   |   | ✓ |   |   |   | ✓ |   | ✓ |   | ✓ |
| Anguilliformes     | Anguillidae       | <i>Anguilla</i>       | <i>Anguilla japonica</i>         |   |   |   |   |   |   |   |   |   |   |   |   | ✓ | ✓ |   |   |
| Siluriformes       | Bagridae          | <i>Tachysurus</i>     | <i>Tachysurus fulvidraco</i>     |   |   |   |   |   |   |   |   |   |   |   | ✓ | ✓ |   |   |   |
|                    |                   |                       | <i>Tachysurus nitidus</i>        | ✓ |   |   |   |   |   |   |   |   |   |   |   |   |   |   |   |
|                    | Siluridae         | <i>Silurus</i>        | <i>Silurus asotus</i>            | ✓ | ✓ | ✓ | ✓ | ✓ |   | ✓ | ✓ | ✓ | ✓ | ✓ | ✓ | ✓ | ✓ | ✓ | ✓ |
| Mugiliformes       | Mugilidae         | <i>Mugil</i>          | <i>Mugil cephalus</i>            |   |   |   |   |   |   |   |   |   |   |   |   |   |   | ✓ | ✓ |
| Clupeiformes       | Engraulidae       | <i>Coilia</i>         | <i>Coilia sp.</i>                | ✓ |   |   |   | ✓ | ✓ | ✓ | ✓ | ✓ | ✓ | ✓ | ✓ | ✓ | ✓ | ✓ | ✓ |
| Cyprinodontiformes | Adrianichthyidae  | <i>Oryzias</i>        | <i>Oryzias sinensis</i>          | ✓ | ✓ | ✓ |   | ✓ |   | ✓ | ✓ | ✓ | ✓ | ✓ | ✓ |   | ✓ | ✓ | ✓ |
